# Supplementary material
Source: Research Square preprint supplement (doi:10.21203/rs.3.rs-8407390/v1)
Supplement: Supplementary file 1 [file 7358e9f8b34a09bc8f53f154.docx]

# Supplemental Figures

### S1 - Dual-reporter visualization, and fluorophore controls

(A) Schematic of the SinR-SinR lifestyle switch in *B. subtilis* and schematics of the corresponding fluorescent dual-reporter readout.

(B) Bottom view of a *B. subtilis* PS-216 microcolony expressing the dual reporter (P*hag*-GFP, P*tapA-mCherry*) at 2 dpi, growing on the edge of an LB agar cube. Stitched image of four FOVs (1 × 1 mm) from a single Z-plane shown split in brightfield (gray), and a merge of GFP (green) and mCherry (magenta) fluorescence.

(C) Epifluorescence image at 60x magnification of stationary phase *B. subtilis* PS-216 cells spotted on 1.5 % 1/2HS0 agarose, grown for 48 h in supplemented Hoagland (0.5 % glycerol, 0.5 % glutamate) shown in false color P*hag*-*gfpmut3* (Green) and P*tapA*-*mCherry* (magenta).

(D) RootChip8NF design: isometric rendering, top-down sketch, and side view of the channel system. The chip consists of eight connected root channels, each with a reservoir and root insert leading to a single outlet. Dimensions and structures are indicated with blue arrows/labels.

(E) Representative maximum intensity projection (left-to-right) of *Arabidopsis thaliana* Col-0 roots colonized for 3 days (as in Fig. 1) with *B. subtilis* PS-216 wild-type (N = 7), a constitutive mCherry-expressing P*veg*-*mCherry* strain (N = 5), and two dual reporter strains: P*hag*-*mCherry*/P*tapA*-*gfpmut3* (N = 15) and P*hag*-*gfpmut3* /P*tapA*-*mCherry* (N =37) (used in Figs. 1, 3, and 5). Images are shown separated in brightfield (left), GFP (middle) and RFP (right) scaled identical for each respective channel. Scaling is indicated in the top right corner.

### S2 - µRhizotron

Schematic sketch, overview and top-down view of a µRhizotron based on PDMS bonded to a 57 x 75 mm coverslip. Sizes are indicated on the left side. A computer-generated Voronoi pattern is set to stabilize the chip and mimic soil particles with an approximate channel width of 400 µm.

### S3 - B. subtilis colonization induces FRK1 and PER5 expression.

Transcriptional reporter lines in the A. thaliana Col-0 background expressed nuclear-targeted triple mVenus (3xmV-NLS) under FRK1 (N = 11/12, 2/2x Chips), PER5 (N = 7/19, 1/3x Chips), or ZAT12 (N = 5, 1/1x Chips) promoters. Ten-day-old roots were grown in the RootChip8NF and treated with B. subtilis PS216 or sterile ½HS0 medium for 3 dpi (N = 8–12). Roots were imaged across stitched FOVs (1 × 5 mm from the tip) in brightfield and YFP channels, maximum-intensity projected, and fluorescence intensity extracted from a 150 µm-wide midline.

(A) Representative FRK1, PER5, and ZAT12 reporter roots, PS216-inoculated and mock-treated. Displayed left to right as brightfield and YFP channel images. The white line indicates the scaling e.g., 500 µm in the lower right corner.

(B) Average midline fluorescence profiles ± SE for mock (blue) and PS216-treated (orange).

(C) Average fluorescence intensity per root; significance by pairwise Two-sided Wilcoxon test , exact adjusted p-values are denoted in the figure (refer to Tab. 8 for summary statistics).

### S4 - Spatial patterning of total, flagellated, and matrix-producing cells in *rbohD, rbohD/F,* and *rbohF;* and the relationship between flagellated and matrix-producing subpopulations

(A) Averaged 2D kernel density estimation (KDE) of Bacillus cell coverage, separated into total fluorescent cells, flagellated (hag-expressing), matrix-producing (tapA-expressing), and their relative share (AreaMatrixp./AreaTotal; green = 0%, magenta = 100%). X-axis: distance from root surface; Y-axis: distance from root tip.

(B) Mean (+/- SE) β-regression models of the flagellated cell share of the population on the rhizoplane relative to coverage by matrix-producing cells, based on averages from 100 × 200 µm bins from the root midline (refer to Tab. 15 for summary statistics).

(C) Comparative analysis of the β-regression models of the flagellated cell share relative to the matrix producer coverage across genotypes, assessing elevation, intercept, and slope; significance testing against Col-0.

# Supplemental Tables

### Table 1 - Bacterial Strains

| **Identifier** | **Genomic Background** | **Genotype** | **Origin** |
| --- | --- | --- | --- |
| DSM402 | *B. subtilis (subtilis)* B168 | wildtype | DSMZ |
| BIB1044 | *B. subtilis* (*subtilis*) PS216 | wildtype | Durret *et. al.* |
| BIB1893 | *B. velezensis* FZB42 | wildtype | Chen *et. al.* |
| BIB2352 | *B. subtilis* (*subtilis*) PS216 | *amyE*::[T*gyrA* P*hag*-*gfpmut3* P*hag*-*gfpmut3* T*gyrA* P*tapA*-*mcherry cat*] | This study |
| BIB2502 | *B. velezensis* FZB42 | *amyE* (*B. v.*)::[T*gyrA* P*hag*-*gfpmut3* T*gyrA* P*tapA*-*mcherry cat*] | This study |
| BIB2354 | *B. subtilis* (*subtilis*) PS-216 | *amyE*::[T*gyrA* P*hag*-*gfpmut3* T*gyrA* P*tapA*-*mcherry cat*] Δ*sinI* | This study |
| BGG0099 | *B. subtilis* (*subtilis*) PS-216 | *amyE*::[ T*gyrA* P*veg*-*mcherry cat*] | This study |
| BGG0115 | *B. subtilis* (*subtilis*) PS-216 | *amyE*::[T*gyrA* P*hag*-*mcherry* T*gyrA* P*tapA*-*gfpmut3 cat*] | This study |
| BGG0116 | *B. subtilis* (*subtilis*) PS216 | *amyE*::[T*gyrA* P*hag*-*gfpmut3* T*gyrA* P*tapA*-*mcherry cat*] Δ*sinR::*[*KnR*] | This study |
| BGG0117 | *B. subtilis* (*subtilis*) PS216 | *amyE*::[T*gyrA* P*hag*-*gfpmut3* T*gyrA* P*tapA*-*mcherry cat*] Δ*sinR::*[*KnR*] | This study |

### Table 2 - Plasmids

| **Identifier** | **Plasmid** | **Genotype** | **Origin** |
| --- | --- | --- | --- |
| EIB380 | pGFP_Star | *‘amyE cat SCS TgyrA LICS promoterless gfpmut3 amyE' bla*  *ColE1 origin* | Trauth & Bischofs (2014) |
| EIB422 | pRFP_Star | *‘amyE cat SCS TgyrA LICS promoterless mcherry amyE' bla*  *ColE1 origin* | Mutlu et al. (2018) |
| EIB579  ECE796 | pRFP_Star_FZB42 | *‘amyE(B. velezensis) cat SCS TgyrA LICS promoterless mcherry amyE(B. velezensis)' bla*  *ColE1 origin* | This study |
| EIB745 | pGFP_Star_Phag | *’amyE cat TgyrA Phag-gfpmut3 amyE’ bla* ColE1 origin | This study |
| EIB748 | pRFP_Star_PtapA | *’amyE cat TgyrA PtapA-mcherry amyE’ bla ColE1 origin* | This study |
| EIB753 | pRFP_Star_Phag-gfp TgyrA PtapA | *’amyE cat TgyrA Phag-gfpmut3 Phag-gfpmut3 TgyrA PtapA-mcherry amyE’ bla* ColE1 origin | This study |
| EIB746 | pGFP_Star_PtapA | *’amyE cat TgyrA PtapA-gfpmut3 amyE’ bla ColE1 origin* | This study |
| EIB747 | pRFP_Star_Phag | *’amyE cat TgyrA Phag-mcherry amyE’ bla ColE1 origin* | This study |
| EIB754 | pGFP_Star_Phag-mCherry TgyrA PtapA | *’amyE cat TgyrA Phag-mcherry TgyrA PtapA-gfpmut3 amyE’ bla ColE1 origin* | This study |
| EIB422_veg | pRFP_Star_Pveg | *‘amyE cat TgyrA Pveg-mcherry amyE' bla ColE1 origin* | This study |

### Table 3 - Primers

| **Identifier** | **Sequence** | **Purpose** |
| --- | --- | --- |
| CK106 | GCTCGCCATGACTTCACTAAC | Verify integration into *amyE* locus |
| CK129 | GAGCATTTGCGCTGCTTG | Verify integration into *amyE* locus |
| ST16 | GGTAAGTTTTCCGTATGTTGC | Integration verification, *gfpmut3* |
| ST243 | GTCTGGGTGCCTTCATAC | Integration verification, *mCherry* |
| BS064 | CCGCGGGCTTTCCCAGCCTCAGAGTTAAATGGTATTGCTTCACT | Amplification of P*tapA* |
| BS065 | GTTCCTCCTTCCCACCTGTAAAACACTGTAACTTGATAT | Amplification of P*tapA* |
| BS156 | CCGCGGGCTTTCCCAGCTTATCGCGGAAAATAAACGAAGCG | Amplification of P*hag* |
| BS157 | GTTCCTCCTTCCCACCAATATGTTGTTAAGGCACGTCCTT | Amplification of P*hag* |
| *veg*_fwd | CCGCGGGCTTTCCCAGCGGAGTTCTGAGAATTGGTATGC | Amplification of P*veg* |
| *veg_*rev | GTTCCTCCTTCCCACCACTACATTTATTGTACAACACGAGC | Amplification of P*veg* |
| *sinI_5pL* | CCGAATTTATGAAGAGACCGTTG | Deletion of *sinI* |
| *sinI_3pR* | CAATACAACAGGTGTCTGGCTATC | Deletion of *sinI* |
| *sinR_5pL* | TGTCATCAGTCCGTTTAACTTCC | Deletion of *sinR* |
| *sinR_3pR* | AAATCGAGTGAACCTGATGACTG | Deletion of  *sinR* |

### Table 4 - Plant Lines

| **Line** | **Genetic Background** | **Origin** |
| --- | --- | --- |
| Col-0 | *Arabidopsis thaliana* Col-0 | NASC (N1092) |
| pPER5:3xmVenus-NLS | *Arabidopsis thaliana* Col-0 | (Zhou et al., 2020) |
| pFRK1::3xmVenus-NLS | *Arabidopsis thaliana* Col-0 | (Zhou et al., 2020) |
| pZAT12:3xmVenus-NLS | *Arabidopsis thaliana* Col-0 | (Zhou et al., 2020) |
| *rbohD* | *Arabidopsis thaliana* Col-0 | (Torres et al., 2002) |
| *rbohF* | *Arabidopsis thaliana* Col-0 | (Torres et al., 2002) |
| *rbohD/rbohF* | *Arabidopsis thaliana* Col-0 | (Torres et al., 2002) |

### Table 5 – β-regression model parameters for the relationship of share of matrix producing cells (0-1) and the distance from the root tip (shown in Fig. 1E) for *B. subtilis* PS-216 and *B. velezensis* FZB42. Every individual root was imaged once and independently and data was aggregated across individual roots.

| **Species** | **Method** | **N (roots)** | **Slope β** | **95 % CI of β** | **Δ per mm (%)** | **p** | **BH adj. p** | **Intercept** |
| --- | --- | --- | --- | --- | --- | --- | --- | --- |
| PS-216 | β - regression | 38 | 0.000373 | 0.000321 - 0.000424 | 7.05 | 1.25 x 10 - 45 | 3.75 x 10 - 45 | - 1.26 |
| FZB42 | β - regression | 19 | 0.000360 | 0.000283 - 0.000437 | 8.80 | 3.65 x 10 - 20 | 5.48 x 10 - 20 | - 0.469 |

### Table 6 – Pairwise comparison of total bacterial cell coverage in the root-associated rhizoplane and rhizosphere (root-non-associated) fraction (shown in Fig. 1F). Upper panel displays the statistical summary, the lower panel the pairwise comparison of group 2 against reference group 1. Every individual root was imaged once and independently, and data was aggregated across individual roots

| **Location** | **Genotype** | **N (roots)** | **Mean (%)** | **SE (%)** | **95 % CI (lower - upper)** |
| --- | --- | --- | --- | --- | --- |
| Rhizoplane | Wildtype | 37 | 12.90 | 1.22 | 10.50 - 15.30 |
| Rhizoplane | Δ*sinI* | 13 | 5.74 | 1.08 | 3.63 - 7.86 |
| Rhizosphere | Wildtype | 37 | 2.98 | 0.304 | 2.38 - 3.58 |
| Rhizosphere | Δ*sinI* | 13 | 2.06 | 0.371 | 1.33 - 2.78 |

| **Location** | **Group 1** | **Group 2** | **Statistics** | **W** | **p** | **BH adj. p** | **Effect Size (rrb)** |
| --- | --- | --- | --- | --- | --- | --- | --- |
| Rhizoplane | Wildtype | Δ*sinI* | Two - sided Wilcoxon | 380 | 0.0015 | 0.0030 | 0.436 |
| Rhizosphere | Wildtype | Δ*sinI* | Two - sided Wilcoxon | 316 | 0.0975 | 0.0975 | 0.236 |

### Table 7 – Longitudinal and radial localization of flagellated-to-matrix-producing switches observed in individual bacterial clusters around a single primary root of *A. thaliana* (shown in Fig. 2D). All spatially isolated fluorescent clusters were treated as replicates, to reflect individual cell type decisions.

| **Parameter** | **N (Clusters)** | **Mean (µm)** | **SE** | **95 % CI (lower - upper)** |
| --- | --- | --- | --- | --- |
| Distance from the Root Tip | 361 | 865.29 | 13.07045 | 839.67 – 980.91 |
| Distance from the Root | 361 | 137.85 | 8.388734 | 121.41 – 154.29 |

### Table 8 – Activation of innate immunity-associated transcriptional reporters after 3-day inoculation with PS-216(shown in Fig. S3). Upper panel displays the statistical summary the lower panel the pair-wise comparison of group 2 against reference group 1. Per captured a image a single root was analyzed and treated as a biological replicate, data is aggregated across all captured roots.

| **Reporter** | **Treatment** | **N (roots)** | **Mean Gray Value** | **SE** | 95 % CI (lower - upper) |
| --- | --- | --- | --- | --- | --- |
|  |  |  |  |  |  |
| FRK1 | Mock | 12 | 47 | 2 | 43 - 51 |
| FRK1 | PS-216 | 12 | 161 | 29 | 104 - 218 |
| PER5 | Mock | 8 | 27 | 4 | 19 - 35 |
| PER5 | PS-216 | 13 | 80 | 10 | 60 - 100 |
| ZAT12 | Mock | 5 | 3390 | 356 | 2692 - 4088 |
| ZAT12 | PS-216 | 5 | 2743 | 125 | 2498 - 2988 |

| Reporter | Group 1 | Group 2 | W | p | **Effect Size (rrb)** |
| --- | --- | --- | --- | --- | --- |
| FRK1 | Mock | PS-216 | 0 | 7.40 x 10-7 | 0.848 |
| PER5 | Mock | PS-216 | 4 | 1.18 x 10-4 | 0.758 |
| ZAT12 | Mock | PS-216 | 20 | 0.151 | 0.495 |

### Table 9 – Oxidative response based on H₂CDFDA fluorescence in mock‑ or PS‑216–treated primary roots of *A. thaliana* Col‑0 (shown in Fig. 3C). The upper panel summarizes fluorescence intensities across treatments. The lower panel reports the mixed‑effects regression analysis, modelling fluorescence as a function of days post inoculation (dpi) while accounting for variation between imaging meshes. Images contained multiple roots, which were traced individually and imaged once, each root fluorescent profile was treated as a biological replicate.

| **Treatment** | **dpi** | **N (roots)** | **Mean Gray Value** | **SE** | 95 % CI (lower - upper) |
| --- | --- | --- | --- | --- | --- |
|  |  |  |  |  |  |
| Untreated | 0 | 102 | 0 | 34 | 0 - 67 |
| Mock | 1 | 101 | 234 | 58 | 120 - 348 |
| Mock | 2 | 101 | 134 | 50 | 36 - 232 |
| Mock | 3 | 85 | 43 | 51 | 0 - 143 |
| PS-216 | 1 | 108 | 85 | 47 | 0 - 177 |
| PS-216 | 2 | 105 | 269 | 55 | 161 - 377 |
| PS-216 | 3 | 93 | 617 | 63 | 494 - 740 |

| **Treatment** | **Method** | **Slope** | 95 % CI (lower - upper) | **t Value** | **Interrcept** | **Significance** |
| --- | --- | --- | --- | --- | --- | --- |
| Mock | Linear Mixed Effect Regression | -0.471 | -72 - 72 | -0.012 | 1.78 x10-14 | Not significant |
| PS-216 | Linear Mixed Effect Regression | 208.434 | 154 - 262 | 7.522 | 1.78 x10-14 | Significant |

### Table 10 – Oxidative response based on H₂CDFDA fluorescence in PS‑216–treated primary roots of *A. thaliana* Col‑0, *rbohD, rbohD/F* and *rbohF* (shown in Fig. 3F). The upper panel summarizes fluorescence intensities across treatments. The lower panel reports the pairwise comparison against the Col-0 reference group (Group 1). Images contained multiple roots, which were traced individually and imaged once; each root’s fluorescence profile was treated as an independent biological replicate.

| Plant Genotype | N (roots) | Mean Gray Value | SE | 95 % CI (lower - upper) |
| --- | --- | --- | --- | --- |
| Col-0 | 29 | 923 | 75 | 776 - 1070 |
| *rbohD* | 39 | 716 | 73 | 573 - 859 |
| *rbohD/F* | 39 | 678 | 56 | 568 - 788 |
| *rbohF* | 19 | 812 | 63 | 689 - 935 |

| **Group 1** | **Group 2** | **Statistics** | **W** | **p** | **BH adj. p** | **Effect Size (rrb)** |
| --- | --- | --- | --- | --- | --- | --- |
| Col-0 | *rbohD* | Two - sided Wilcoxon | 789 | 0.005 | 0.0150 | 0.336 |
| Col-0 | *rbohD/F* | Two - sided Wilcoxon | 760 | 0.015 | 0.0225 | 0.292 |
| Col-0 | *rbohF* | Two - sided Wilcoxon | 309 | 0.490 | 0.4900 | 0.102 |

### Table 11 – Total, flagellated cells and matrix-producing cell coverage of *A. thaliana* Col-0, *rbohD*, *rbohD/F,* and *rbohF* (shown in Fig. 5B). The upper panel summarizes area coverage across roots, while the lower panel displays the pair-wise comparison against the Col-0 reference group (Group 1). Each root was imaged individually and treated as a biological replicate.

| Subpopulation | Plant Genotype | **N (roots)** | **Mean (%)** | **SE (%)** | 95 % CI (lower - upper) |
| --- | --- | --- | --- | --- | --- |
| Total | Col-0 | 37 | 4.03 | 0.34 | 3.36 - 4.7 |
| Total | *rbohD* | 22 | 6.11 | 0.98 | 4.19 - 8.03 |
| Total | *rbohD/F* | 28 | 9.12 | 1.08 | 7 - 11.24 |
| Total | *rbohF* | 20 | 3.90 | 0.51 | 2.9 - 4.9 |
| Flagellated | Col-0 | 37 | 2.03 | 0.22 | 1.6 - 2.46 |
| Flagellated | *rbohD* | 22 | 4.68 | 0.89 | 2.94 - 6.42 |
| Flagellated | *rbohD/F* | 28 | 6.70 | 0.88 | 4.98 - 8.42 |
| Flagellated | *rbohF* | 20 | 2.33 | 0.54 | 1.27 - 3.39 |
| Matrix - producing | Col-0 | 37 | 2.00 | 0.27 | 1.47 - 2.53 |
| Matrix - producing | *rbohD* | 22 | 1.44 | 0.37 | 0.71 - 2.17 |
| Matrix - producing | *rbohD/F* | 28 | 2.42 | 0.36 | 1.71 - 3.13 |
| Matrix - producing | *rbohF* | 20 | 1.57 | 0.26 | 1.06 - 2.08 |

| **Subpopulation** | **Group 1** | **Group 2** | **Statistics** | **W** | **p** | **BH adj. p** | **Effect Size (rrb)** |
| --- | --- | --- | --- | --- | --- | --- | --- |
| Total | Col-0 | *rbohD* | Two - sided Wilcoxon | 309 | 0.127 | 0.229 | 0.200 |
| Total | Col-0 | *rbohD/F* | Two - sided Wilcoxon | 202 | 1.35  × 10 - 5 | 6.08  × 10 - 5 | 0.519 |
| Total | Col-0 | *rbohF* | Two - sided Wilcoxon | 397 | 0.66 | 0.697 | 0.060 |
| Flagellated | Col-0 | *rbohD* | Two - sided Wilcoxon | 254 | 0.016 | 0.048 | 0.312 |
| Flagellated | Col-0 | *rbohD/F* | Two - sided Wilcoxon | 125 | 2.06  × 10 - 8 | 1.85  × 10 - 7 | 0.646 |
| Flagellated | Col-0 | *rbohF* | Two - sided Wilcoxon | 394 | 0.697 | 0.697 | 0.053 |
| Matrix - producing | Col-0 | *rbohD* | Two - sided Wilcoxon | 521 | 0.075 | 0.169 | 0.233 |
| Matrix - producing | Col-0 | *rbohD/F* | Two - sided Wilcoxon | 459 | 0.441 | 0.662 | 0.097 |
| Matrix - producing | Col-0 | *rbohF* | Two - sided Wilcoxon | 408 | 0.534 | 0.687 | 0.084 |

### Table 12 – Matrix-producer coverage, matrix producer share to the total population and flagellated cell coverage of *A. thaliana* Col-0, *rbohD*, *rbohD/F,* and *rbohF* (shown in Fig. 5E). The upper panel summarizes area coverage and population share across roots, while the lower panel displays the pair-wise comparison against the Col-0 reference group (Group 1). Each root was imaged individually and treated as a biological replicate.

| **Plant Genotype** | **Parameter** | **N (roots)** | **Mean (%)** | **SE (%)** | 95 % CI (lower - upper) |
| --- | --- | --- | --- | --- | --- |
|  |  |  |  |  |  |
| Col0 | Matrixproducer Coverage | 37 | 7.18 | 0.91 | 5.4 - 8.96 |
| Col0 | Matrixproducer Share | 37 | 50.55 | 3.94 | 42.83 - 58.27 |
| Col0 | Flagellated Coverage | 37 | 5.72 | 0.58 | 4.58 - 6.86 |
| *rbohD* | Matrixproducer Coverage | 22 | 3.29 | 1.09 | 1.15 - 5.43 |
| *rbohD* | Matrixproducer Share | 22 | 25.64 | 5.46 | 14.94 - 36.34 |
| *rbohD* | Flagellated Coverage | 22 | 10.05 | 2.28 | 5.58 - 14.52 |
| *rbohD/F* | Matrixproducer Coverage | 28 | 5.83 | 0.94 | 3.99 - 7.67 |
| *rbohD/F* | Matrixproducer Share | 28 | 25.87 | 3.63 | 18.76 - 32.98 |
| *rbohD/F* | Flagellated Coverage | 28 | 14.91 | 1.67 | 11.64 - 18.18 |
| *rbohF* | Matrixproducer Coverage | 20 | 4.47 | 0.81 | 2.88 - 6.06 |
| *rbohF* | Matrixproducer Share | 20 | 50.47 | 5.73 | 39.24 - 61.7 |
| *rbohF* | Flagellated Coverage | 20 | 5.41 | 1.32 | 2.82 - 8 |

| **Measurement** | **Group 1** | **Group 2** | **W** | **p** | **BH - adj. p** | **Effect Size (rrb)** |
| --- | --- | --- | --- | --- | --- | --- |
| Matrixproducer Coverage | Col-0 | *rbohD* | 596 | 0.003 | 0.00675 | 0.386 |
| Matrixproducer Coverage | Col-0 | *rbohD/F* | 585 | 0.381 | 0.429 | 0.110 |
| Matrixproducer Coverage | Col-0 | *rbohF* | 469 | 0.1 | 0.18 | 0.219 |
| Matrixproducer Share | Col-0 | *rbohD* | 613 | 9.81 × 10-4 | 0.00294 | 0.420 |
| Matrixproducer Share | Col-0 | *rbohD/F* | 809 | 7.06 × 10-5 | 3.17 × 10-4 | 0.478 |
| Matrixproducer Share | Col-0 | *rbohF* | 377 | 0.914 | 0.914 | 0.016 |
| Flagellated Coverage | Col-0 | *rbohD* | 333 | 0.252 | 0.327 | 0.151 |
| Flagellated Coverage | Col-0 | *rbohD/F* | 174 | 1.67 × 10-6 | 1.50 × 10-5 | 0.565 |
| Flagellated Coverage | Col-0 | *rbohF* | 439 | 0.254 | 0.327 | 0.153 |

### Table 13 – Spatial shift in matrix-producer contribution to the whole population of colonizing PS-216 cells on *A. thaliana* Col-0, *rbohD*, *rbohD/F,* and *rbohF* (shown in Fig. 5G). The upper panel summarizes area coverage and population share across roots, while the lower panel displays the pair-wise comparison against the Col-0 reference group (Group 1) for each spatial bin. Each root was imaged individually and treated as a biological replicate.

| **Spatial Bin** | **Plant_Genotype** | **N (roots)** | **Mean (%)** | **SE (%)** | 95 % CI (lower - upper) |
| --- | --- | --- | --- | --- | --- |
|  |  |  |  |  |  |
| 1000 µm | Col-0 | 37 | 31.05 | 4.80 | 21.64 - 40.46 |
| 1000 µm | *rbohD* | 22 | 17.24 | 4.60 | 8.22 - 26.26 |
| 1000 µm | *rbohD/F* | 28 | 16.65 | 3.55 | 9.69 - 23.61 |
| 1000 µm | *rbohF* | 20 | 25.61 | 5.98 | 13.89 - 37.33 |
| 2000 µm | Col-0 | 37 | 42.24 | 4.57 | 33.28 - 51.2 |
| 2000 µm | *rbohD* | 22 | 18.59 | 4.91 | 8.97 - 28.21 |
| 2000 µm | *rbohD/F* | 28 | 20.12 | 3.63 | 13.01 - 27.23 |
| 2000 µm | *rbohF* | 20 | 41.99 | 6.25 | 29.74 - 54.24 |
| 3000 µm | Col-0 | 37 | 49.51 | 4.02 | 41.63 - 57.39 |
| 3000 µm | *rbohD* | 22 | 26.41 | 5.92 | 14.81 - 38.01 |
| 3000 µm | *rbohD/F* | 28 | 29.58 | 4.59 | 20.58 - 38.58 |
| 3000 µm | *rbohF* | 20 | 54.46 | 6.12 | 42.46 - 66.46 |
| 4000 µm | Col-0 | 37 | 59.93 | 4.49 | 51.13 - 68.73 |
| 4000 µm | *rbohD* | 22 | 33.90 | 6.20 | 21.75 - 46.05 |
| 4000 µm | *rbohD/F* | 28 | 37.71 | 5.44 | 27.05 - 48.37 |
| 4000 µm | *rbohF* | 20 | 58.18 | 6.23 | 45.97 - 70.39 |
| 5000 µm | Col-0 | 37 | 63.68 | 3.54 | 56.74 - 70.62 |
| 5000 µm | *rbohD* | 22 | 38.98 | 6.41 | 26.42 - 51.54 |
| 5000 µm | *rbohD/F* | 28 | 41.20 | 5.36 | 30.69 - 51.71 |
| 5000 µm | *rbohF* | 20 | 64.08 | 5.72 | 52.87 - 75.29 |

| **Spatial Bin** | **Group 1** | **Group 2** | **Statistics** | **p** | **BH - adj. p** | **Effect Size (rrb)** |
| --- | --- | --- | --- | --- | --- | --- |
| 1000 µm | Col-0 | *rbohD* | Two-sided Wilcoxon Test | 0.089 | 0.148 | 0.222 |
| 1000 µm | Col-0 | *rbohD/F* | Two-sided Wilcoxon Test | 0.152 | 0.228 | 0.179 |
| 1000 µm | Col-0 | *rbohF* | Two-sided Wilcoxon Test | 0.613 | 0.766 | 0.069 |
| 2000 µm | Col-0 | *rbohD* | Two-sided Wilcoxon Test | 0.005 | 0.009 | 0.361 |
| 2000 µm | Col-0 | *rbohD/F* | Two-sided Wilcoxon Test | 0.002 | 0.009 | 0.386 |
| 2000 µm | Col-0 | *rbohF* | Two-sided Wilcoxon Test | 0.901 | 0.901 | 0.018 |
| 3000 µm | Col-0 | *rbohD* | Two-sided Wilcoxon Test | 0.005 | 0.009 | 0.361 |
| 3000 µm | Col-0 | *rbohD/F* | Two-sided Wilcoxon Test | 0.002 | 0.009 | 0.378 |
| 3000 µm | Col-0 | *rbohF* | Two-sided Wilcoxon Test | 0.323 | 0.440 | 0.133 |
| 4000 µm | Col-0 | *rbohD* | Two-sided Wilcoxon Test | 0.003 | 0.009 | 0.386 |
| 4000 µm | Col-0 | *rbohD/F* | Two-sided Wilcoxon Test | 0.002 | 0.009 | 0.371 |
| 4000 µm | Col-0 | *rbohF* | Two-sided Wilcoxon Test | 0.734 | 0.786 | 0.047 |
| 5000 µm | Col-0 | *rbohD* | Two-sided Wilcoxon Test | 0.004 | 0.009 | 0.367 |
| 5000 µm | Col-0 | *rbohD/F* | Two-sided Wilcoxon Test | 0.004 | 0.009 | 0.355 |
| 5000 µm | Col-0 | *rbohF* | Two-sided Wilcoxon Test | 0.697 | 0.786 | 0.053 |

### Table 14 – β-regression analysis of matrix-producer share to the whole population of colonizing PS-216 cells in relationship to the distance from the root tip on *A. thaliana* Col-0, *rbohD*, *rbohD/F,* and *rbohF* (shown in Fig. 5H and I). The upper panel summarizes the mean model parameters of each group, while the lower panel displays the pair-wise comparison against the Col-0 reference group (Group 1) for each parameter. Each root was imaged individually and treated as a biological replicate.

| **Plant Genotype** | **Parameter** | **N (roots)** | **Mean (%)** | **SE (%)** | 95 % CI (lower - upper) |
| --- | --- | --- | --- | --- | --- |
|  |  |  |  |  |  |
| Col0 | Elevation | 37 | 51.82 | 3.08 | 45.78 - 57.86 |
| Col0 | Intercept | 37 | 35.54 | 3.82 | 28.05 - 43.03 |
| Col0 | Slope | 37 | 5.32 | 0.91 | 3.54 - 7.1 |
| *rbohD* | Elevation | 22 | 30.60 | 4.23 | 22.31 - 38.89 |
| *rbohD* | Intercept | 22 | 19.89 | 3.93 | 12.19 - 27.59 |
| *rbohD* | Slope | 22 | 2.66 | 0.97 | 0.76 - 4.56 |
| *rbohD/F* | Elevation | 28 | 29.71 | 3.45 | 22.95 - 36.47 |
| *rbohD/F* | Intercept | 28 | 16.33 | 3.15 | 10.16 - 22.5 |
| *rbohD/F* | Slope | 28 | 3.33 | 1.20 | 0.98 - 5.68 |
| *rbohF* | Elevation | 20 | 49.81 | 4.54 | 40.91 - 58.71 |
| *rbohF* | Intercept | 20 | 32.19 | 4.60 | 23.17 - 41.21 |
| *rbohF* | Slope | 20 | 5.60 | 1.08 | 3.48 - 7.72 |

| **Group 1** | **Group 2** | **Parameter** | **Statistics** | **W** | **p** | **BH - adj. p** | **Effect Size (rrb)** |
| --- | --- | --- | --- | --- | --- | --- | --- |
| Col-0 | rbohD | Slope | Two - sided Wilcoxon | 526 | 0.063 | 0.189 | 0.243 |
| Col-0 | rbohD/F | Slope | Two - sided Wilcoxon | 606 | 0.248 | 0.372 | 0.145 |
| Col-0 | rbohF | Slope | Two - sided Wilcoxon | 379 | 0.888 | 0.888 | 0.020 |
| Col-0 | rbohD | Intercept | Two - sided Wilcoxon | 577 | 0.007 | 0.0105 | 0.347 |
| Col-0 | rbohD/F | Intercept | Two - sided Wilcoxon | 798 | 1.38 × 10 - 4 | 4.14 × 10 - 4 | 0.460 |
| Col-0 | rbohF | Intercept | Two - sided Wilcoxon | 392 | 0.722 | 0.722 | 0.049 |
| Col-0 | rbohD | Elevation | Two - sided Wilcoxon | 638 | 1.90 × 10 - 4 | 2.85 × 10 - 4 | 0.471 |
| Col-0 | rbohD/F | Elevation | Two - sided Wilcoxon | 834 | 1.35 × 10 - 5 | 4.05 × 10 - 5 | 0.519 |
| Col-0 | rbohF | Elevation | Two - sided Wilcoxon | 390 | 0.747 | 0.747 | 0.044 |

### Table 15 – β-regression analysis of matrix-producer share to the whole population of colonizing PS-216 cells in relationship to the distance from the root tip on *A. thaliana* Col-0, *rbohD*, *rbohD/F,* and *rbohF* (shown in Fig. S4) The upper panel summarizes the mean model parameters of each group, while the lower panel displays the pair-wise comparison against the Col-0 reference group (Group 1) for each parameter. Each root was imaged individually and treated as a biological replicate.

| **Plant Genotype** | **Parameter** | **N (roots)** | **Mean (%)** | **SE (%)** | 95 % CI (lower - upper) |
| --- | --- | --- | --- | --- | --- |
| Col0 | Elevation | 37 | 47.65 | 3.09 | 41.59 - 53.71 |
| Col0 | Intercept | 37 | 15.43 | 1.39 | 12.71 - 18.15 |
| Col0 | Slope | 37 | -109.75 | 8.68 | -126.76 - (-92.74) |
| *rbohD* | Elevation | 22 | 69.16 | 4.30 | 60.73 - 77.59 |
| *rbohD* | Intercept | 22 | 23.04 | 5.00 | 13.24 - 32.84 |
| *rbohD* | Slope | 22 | -129.01 | 11.53 | -151.61 - (-106.41) |
| *rbohD/F* | Elevation | 28 | 69.81 | 3.52 | 62.91 - 76.71 |
| *rbohD/F* | Intercept | 28 | 26.86 | 2.65 | 21.67 - 32.05 |
| *rbohD/F* | Slope | 28 | -133.98 | 6.43 | -146.58 – (-121.38) |
| *rbohF* | Elevation | 20 | 49.36 | 4.66 | 40.23 - 58.49 |
| *rbohF* | Intercept | 20 | 12.59 | 1.53 | 9.59 - 15.59 |
| *rbohF* | Slope | 20 | -128.00 | 8.13 | -143.93 - (-112.07) |

| **Group 1** | **Group 2** | **Parameter** | **Statistics** | **W** | **p** | **BH - adj. p** | **Effect Size (rrb)** |
| --- | --- | --- | --- | --- | --- | --- | --- |
| Col-0 | rbohD | Slope | Two - sided Wilcoxon | 536 | 0.043 | 0.0885 | 0.263 |
| Col-0 | rbohD/F | Slope | Two - sided Wilcoxon | 661 | 0.059 | 0.0885 | 0.235 |
| Col-0 | rbohF | Slope | Two - sided Wilcoxon | 463 | 0.123 | 0.123 | 0.206 |
| Col-0 | rbohD | Intercept | Two - sided Wilcoxon | 398 | 0.895 | 0.895 | 0.018 |
| Col-0 | rbohD/F | Intercept | Two - sided Wilcoxon | 235 | 1.16 × 10-4 | 3.48 × 10-4 | 0.465 |
| Col-0 | rbohF | Intercept | Two - sided Wilcoxon | 446 | 0.209 | 0.314 | 0.168 |
| Col-0 | rbohD | Elevation | Two - sided Wilcoxon | 172 | 1.43 × 10-4 | 2.15 × 10-4 | 0.480 |
| Col-0 | rbohD/F | Elevation | Two - sided Wilcoxon | 205 | 1.66 × 10-5 | 4.98 × 10-5 | 0.514 |
| Col-0 | rbohF | Elevation | Two - sided Wilcoxon | 354 | 0.797 | 0.797 | 0.035 |
